# Supplementary material for: GlutathioneS-transferase as a general and reversible tag for surface immobilization of proteins
Source: Royal Society of Chemistry journal article supplement (doi:10.1039/c0jm02370a), 2010-10-27
Supplement: c0jm02370a.pdf [file c0jm02370a.pdf]

# Glutathione-S-Transferase as a General and Reversible Tag for Surface Immobilization of Proteins

Christopher M. Kolodziej,<sup>a</sup> Chien-Wen Chang<sup>a,b</sup> and Heather D. Maynard<sup>\*a</sup>

<sup>a</sup> Department of Chemistry and Biochemistry and the California NanoSystems Institute, University of California, Los Angeles, 607 Charles E. Young Drive South, Los Angeles, CA 90095, USA.

\* maynard@chem.ucla.edu

<sup>b</sup> Department of Bioengineering, University of California, San Diego, 9500 Gilman Drive, San Diego, CA 92093, USA.

## Supporting Information

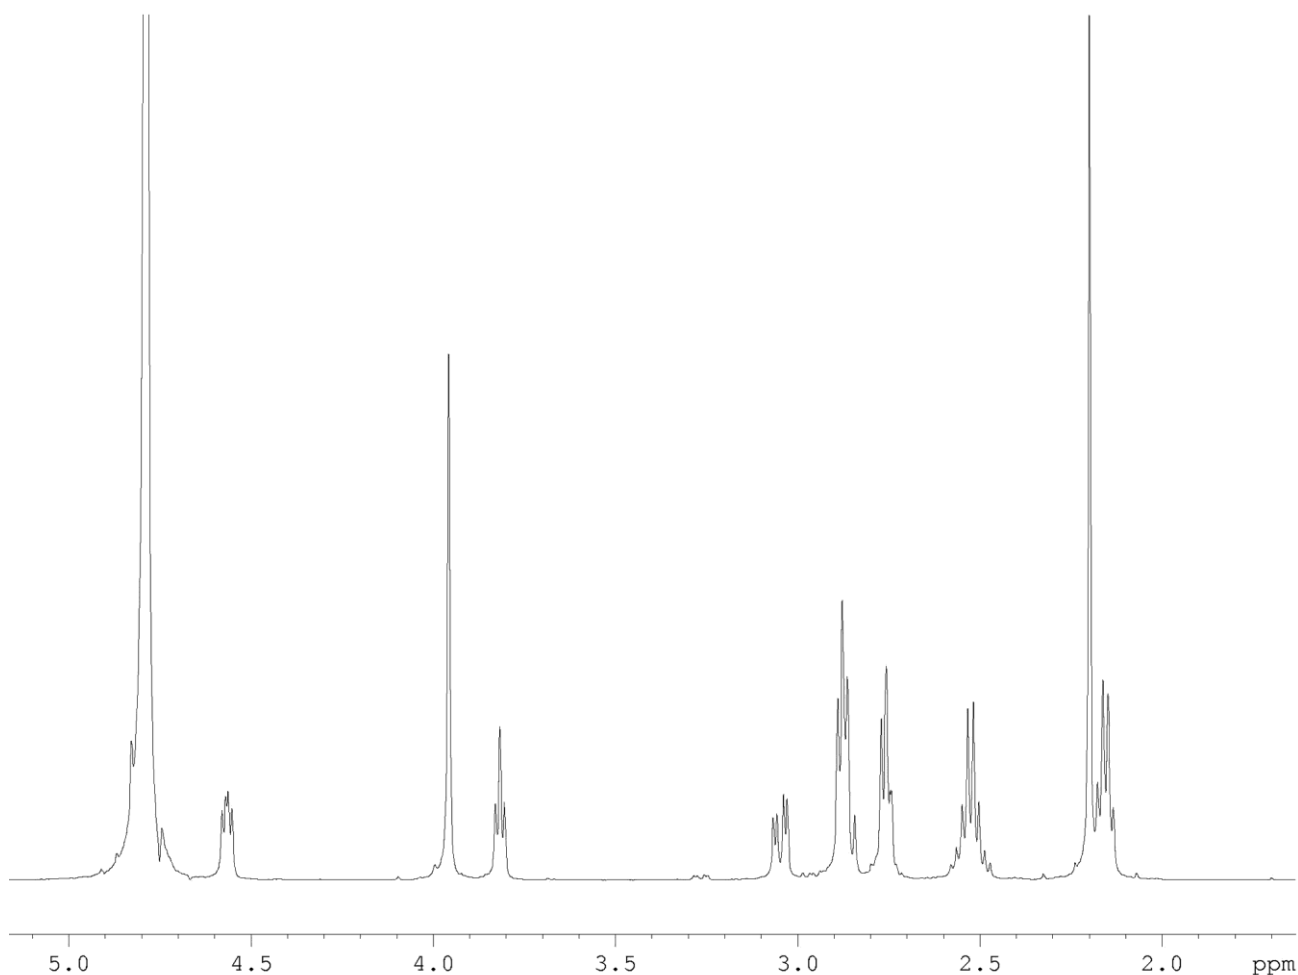

**Fig. S1** <sup>1</sup>H NMR of 4-S-glutathionyl-2-oxobutane

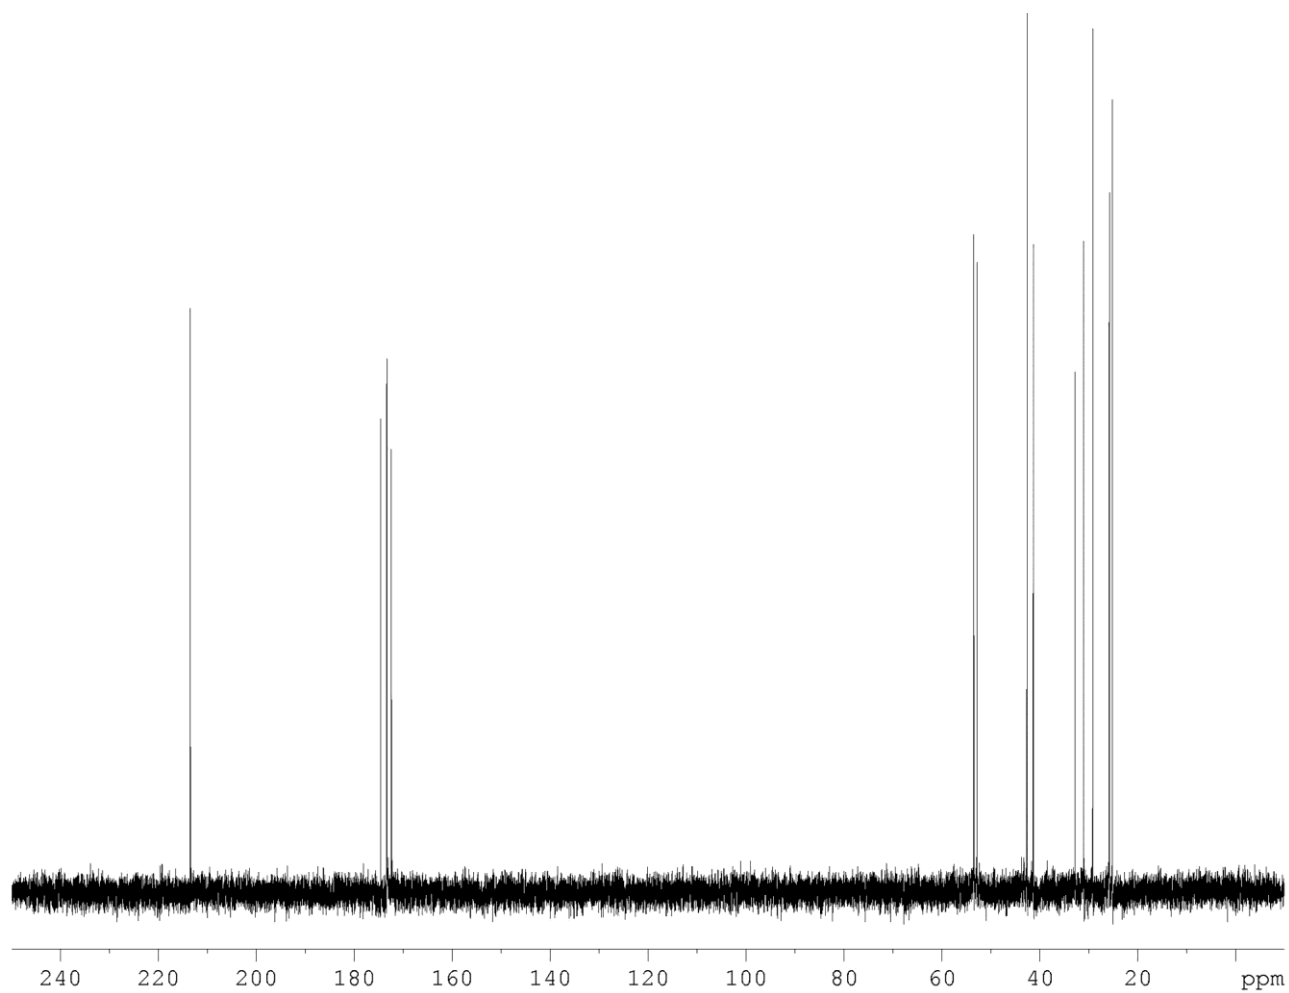

**Fig. S2**  $^{13}\text{C}$  NMR of 4-S-glutathionyl-2-oxobutane

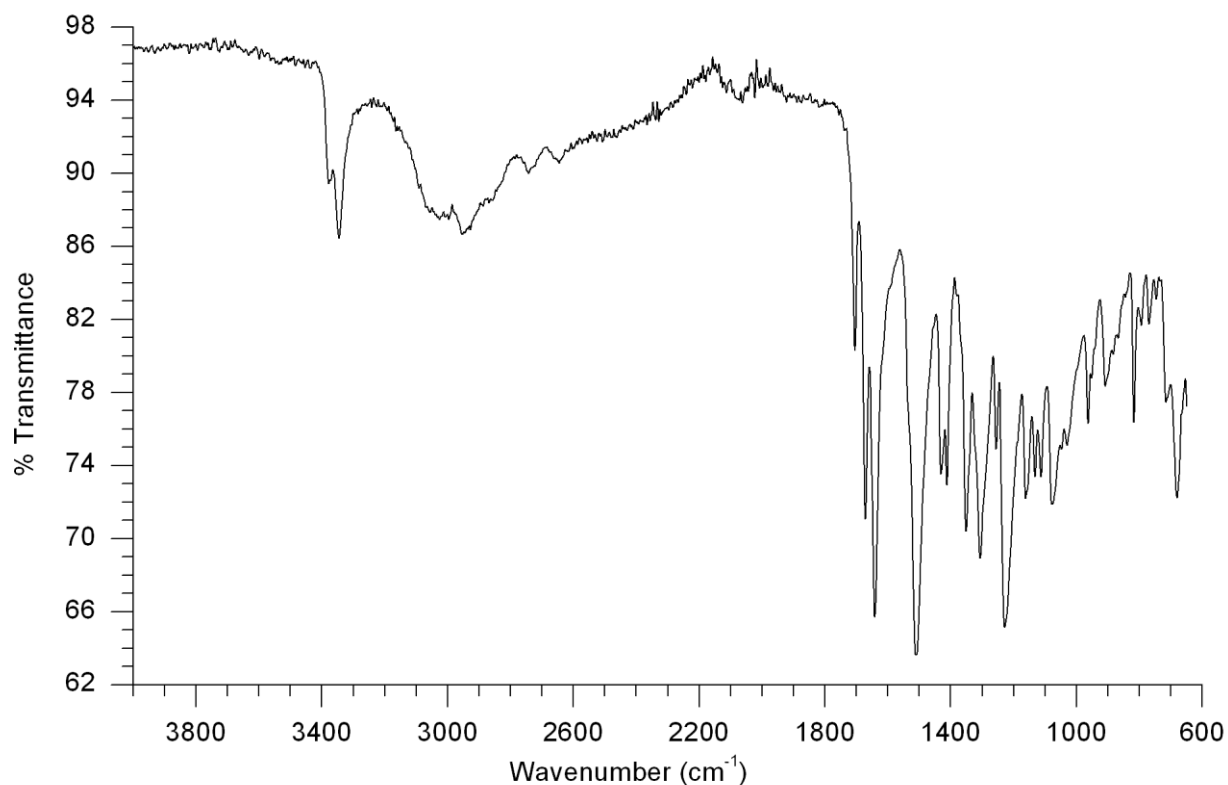

**Fig. S3** FTIR Spectrum of 4-S-glutathionyl-2-oxobutane

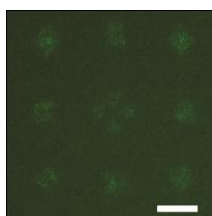

**Fig. S4** Fluorescence image of negative control surface with GST immobilization attempted on aminoxy-functionalized wafers without GSH present.

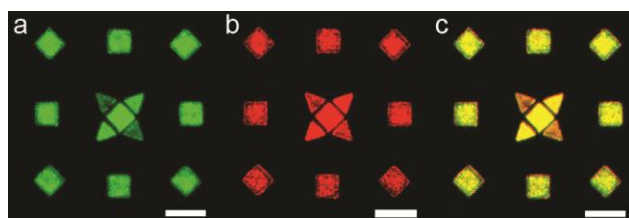

**Fig. S5** Fluorescence images of immobilized GST-FGF2. Immunostaining for GST (a) and FGF2 (b) are colocalized in the composite image (c).
